# Supplementary material for: Inhibitory effects of NAMI-A-like ruthenium complexes on prion neuropeptide fibril formation
Source: Royal Society of Chemistry journal article supplement (doi:10.1039/c5mt00029g), 2015-01-01
Supplement: c5mt00029g1.pdf [file c5mt00029g1.pdf]

*Supporting information for*

**Inhibitory effects of NAMI-A-like ruthenium complexes on  
prion neuropeptide fibril formation**

Xuesong **Wang**, Dengsen **Zhu**, Cong **Zhao**, Lei **He**, Weihong**Du**\*

Department of Chemistry, Renmin University of China, Beijing 100872, People's

Republic of China

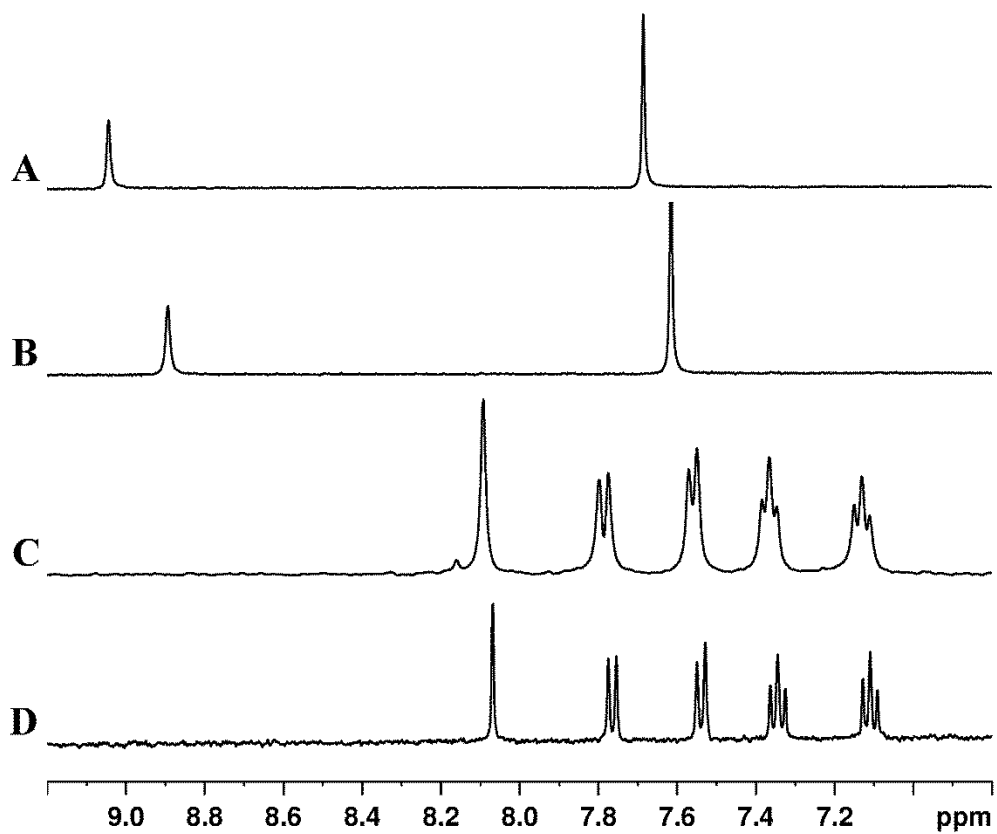

**Figure S1.** The <sup>1</sup>H-NMR spectra of the complexes KP418 (A), NAMI-A (B), KP1019 (C), and KP1019-2(D).

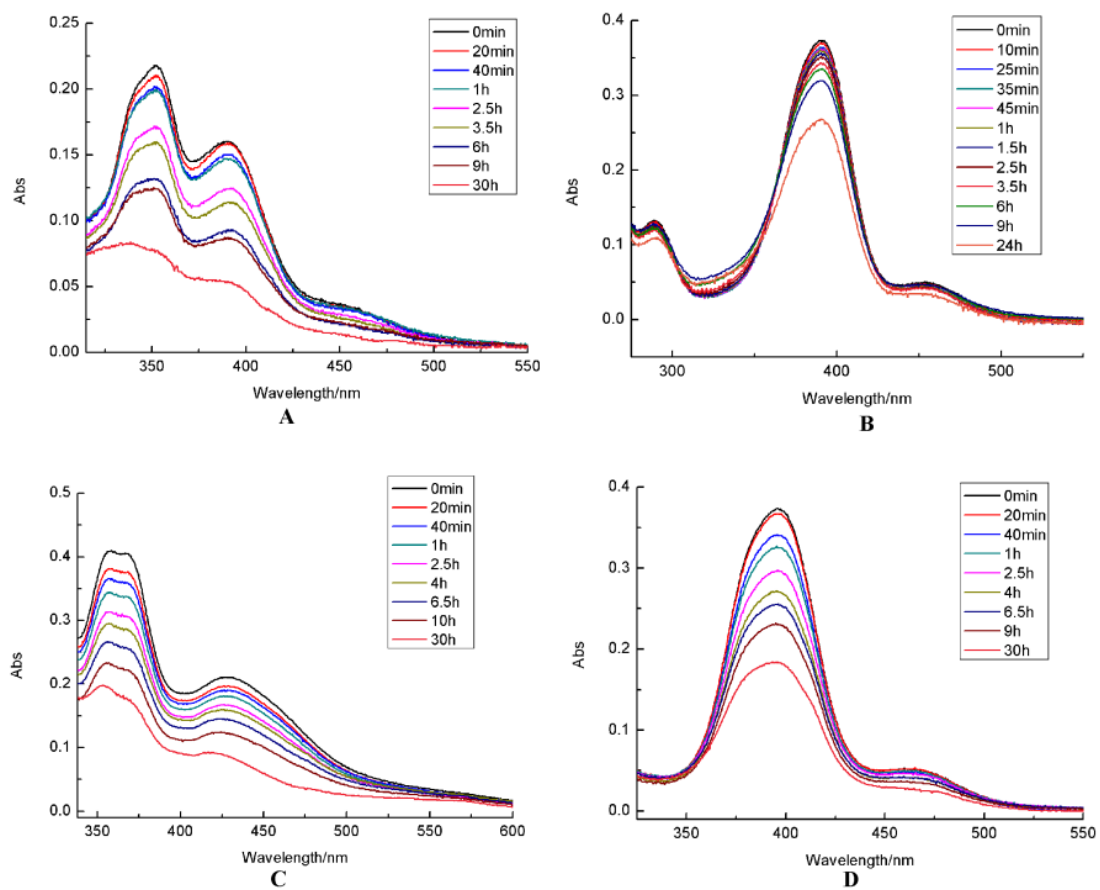

**Figure S2.** The UV-vis spectra of NAMI-A-like complexes carried out in aqueous solution. A. KP418, B. NAMI-A, C. KP1019, D. KP1019-2.

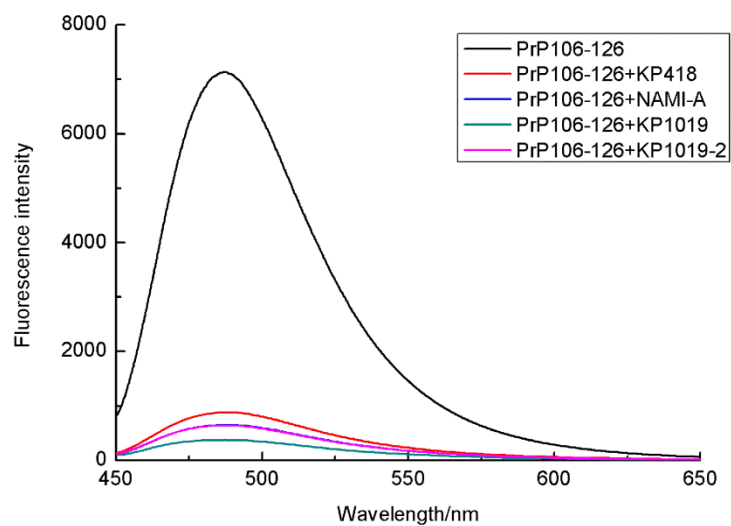

**Figure S3.** Evaluation of the ability of KP418, NAMI-A, KP1019, and KP1019-2 to inhibit the aggregation of PrP106–126.

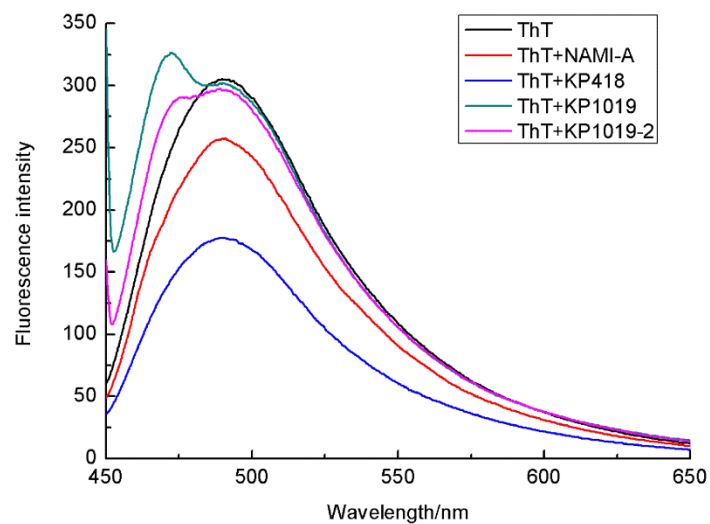

**Figure S4.** The ThT spectra carried out in the presence and absence of ruthenium complexes. Compared with fluorescence intensity of PrP106-126, the FL intensity of metal complex is small enough to be ignored.

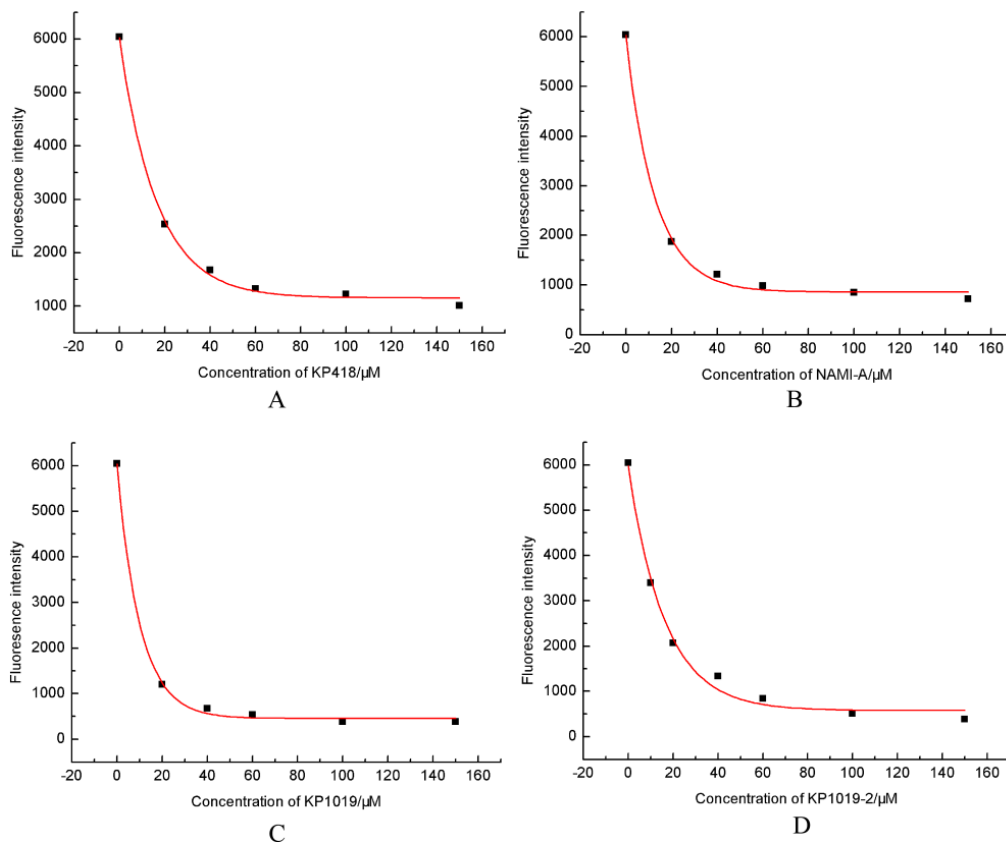

**Figure S5.** The ability of ruthenium complexes to inhibit the aggregation of PrP106–126, KP418 (A), NAMI-A (B), KP1019 (C), and KP1019-2 (D) measured by ThT fluorescence assay. The concentration of the peptide was 100  $\mu\text{M}$  and the  $\text{IC}^{50}$  values were summarized in Table 2.

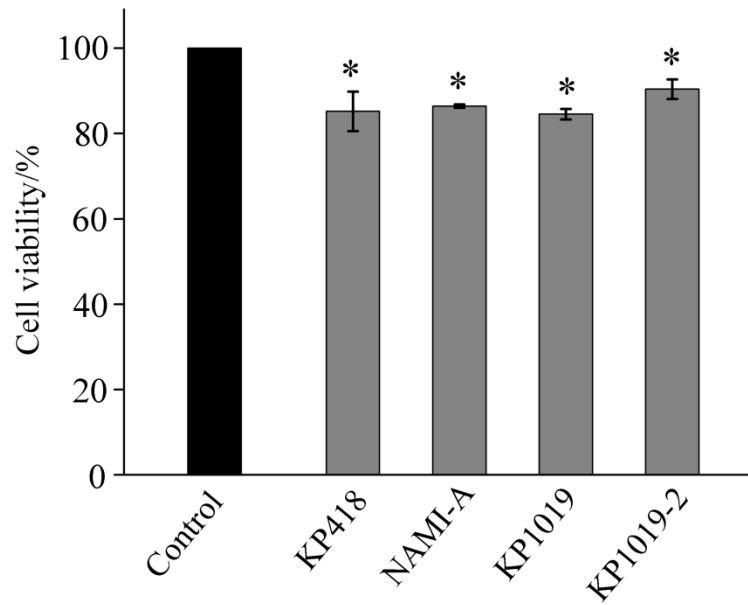

**Figure S6.** Effects of ruthenium complex on the viability of human SH-SY5Y cells determined with a MTT assay. It means that ruthenium complex have a relative low cytotoxicity. \*P < 0.01 versus control group.
